# Supplementary material
Source: Elsevier journal article supplement (http://library.osu.edu/projects/msa/suppmat/v242.i2.pp129-138/mmc1.pdf)
Supplement: mmc1 [file mmc1.pdf]

## Supplementary information

transoid conformer of n-C<sub>4</sub>F<sub>10</sub>

| Center<br>Number | Atomic<br>Number | Coordinates (Angstroms) |           |           |
|------------------|------------------|-------------------------|-----------|-----------|
|                  |                  | X                       | Y         | Z         |
| 1                | 6                | 0.544864                | -0.550486 | -0.098555 |
| 2                | 6                | -0.544864               | 0.550486  | -0.098555 |
| 3                | 6                | 0.004528                | 1.987721  | 0.078956  |
| 4                | 6                | -0.004528               | -1.987721 | 0.078956  |
| 5                | 9                | -0.979410               | 2.844762  | -0.140628 |
| 6                | 9                | 0.979410                | -2.844762 | -0.140628 |
| 7                | 9                | 1.410662                | -0.322527 | 0.896449  |
| 8                | 9                | 1.197655                | -0.503347 | -1.263230 |
| 9                | 9                | -1.410662               | 0.322527  | 0.896449  |
| 10               | 9                | -1.197655               | 0.503347  | -1.263230 |
| 11               | 9                | 0.979410                | 2.220790  | -0.785897 |
| 12               | 9                | 0.459079                | 2.169330  | 1.306372  |
| 13               | 9                | -0.979410               | -2.220790 | -0.785897 |
| 14               | 9                | -0.459079               | -2.169330 | 1.306372  |

ortho conformer of n-C<sub>4</sub>F<sub>10</sub>

| Center<br>Number | Atomic<br>Number | Coordinates (Angstroms) |           |           |
|------------------|------------------|-------------------------|-----------|-----------|
|                  |                  | X                       | Y         | Z         |
| 1                | 6                | -0.656815               | -0.422389 | 0.527670  |
| 2                | 6                | 0.656815                | 0.422389  | 0.527670  |
| 3                | 6                | 0.656815                | 1.657920  | -0.407006 |
| 4                | 6                | -0.656815               | -1.657920 | -0.407006 |
| 5                | 9                | 1.877855                | 2.168779  | -0.420083 |
| 6                | 9                | -1.877855               | -2.168779 | -0.420083 |
| 7                | 9                | -1.685252               | 0.360467  | 0.177203  |
| 8                | 9                | -0.866859               | -0.875882 | 1.765769  |
| 9                | 9                | 1.685252                | -0.360467 | 0.177203  |
| 10               | 9                | 0.866859                | 0.875882  | 1.765769  |
| 11               | 9                | -0.182426               | 2.576639  | 0.038325  |
| 12               | 9                | 0.321404                | 1.321351  | -1.641657 |
| 13               | 9                | 0.182426                | -2.576639 | 0.038325  |
| 14               | 9                | -0.321404               | -1.321351 | -1.641657 |

gauche conformer of n-C<sub>4</sub>F<sub>10</sub>

| Center<br>Number | Atomic<br>Number | Coordinates (Angstroms) |           |           |
|------------------|------------------|-------------------------|-----------|-----------|
|                  |                  | X                       | Y         | Z         |
| 1                | 6                | -0.262951               | -0.730866 | 0.680838  |
| 2                | 6                | 0.262951                | 0.730866  | 0.680838  |
| 3                | 6                | -0.081357               | 1.618332  | -0.536742 |
| 4                | 6                | 0.081357                | -1.618332 | -0.536742 |
| 5                | 9                | 0.261137                | 2.865423  | -0.261875 |
| 6                | 9                | -0.261137               | -2.865423 | -0.261875 |
| 7                | 9                | -1.593634               | -0.709316 | 0.802954  |
| 8                | 9                | 0.262951                | -1.313855 | 1.764531  |
| 9                | 9                | 1.593634                | 0.709316  | 0.802954  |
| 10               | 9                | -0.262951               | 1.313855  | 1.764531  |
| 11               | 9                | -1.377539               | 1.574744  | -0.797953 |
| 12               | 9                | 0.593019                | 1.219127  | -1.603720 |
| 13               | 9                | 1.377539                | -1.574744 | -0.797953 |
| 14               | 9                | -0.593019               | -1.219127 | -1.603720 |
